# Supplementary material for: Textile Waste-Derived Cobalt Nanoparticles Embedded in Active Carbon Fiber for Efficient Activation of Peroxymonosulfate to Remove Organic Pollutants
Source: MDPI journal article supplement (doi:10.3390/nano13192724), 2023-10-08
Supplement: s1 [file s1]

## Supplementary data

### **Textile wastes derived cobalt nanoparticles embedded in active carbon fiber for efficient activation of peroxymonosulfate to remove organic pollutants**

Peiyuan Xiao<sup>a,b</sup>, Ying Wang<sup>a,b</sup>, Huanzheng Du<sup>b</sup>, Zhiyong Yan<sup>a</sup>, Bincheng Xu<sup>a</sup>, ,

Guangming Li<sup>a,b\*</sup>

<sup>1</sup>State Key Laboratory of Pollution Control and Resources Reuse, College of Environmental Science and Engineering, Tongji University, Shanghai, 200092, China

<sup>2</sup>UNEP-Tongji Institute of Environment for Sustainable Development, Tongji University, Shanghai, 200092, China

Corresponding author:

\*Guangming Li, College of Environmental Science and Engineering, Tongji University, Shanghai, 200092, China

Tel./Fax: 86-13681662640, E-mail:ligm@tongji.edu.cn

Declarations of interest: none

---

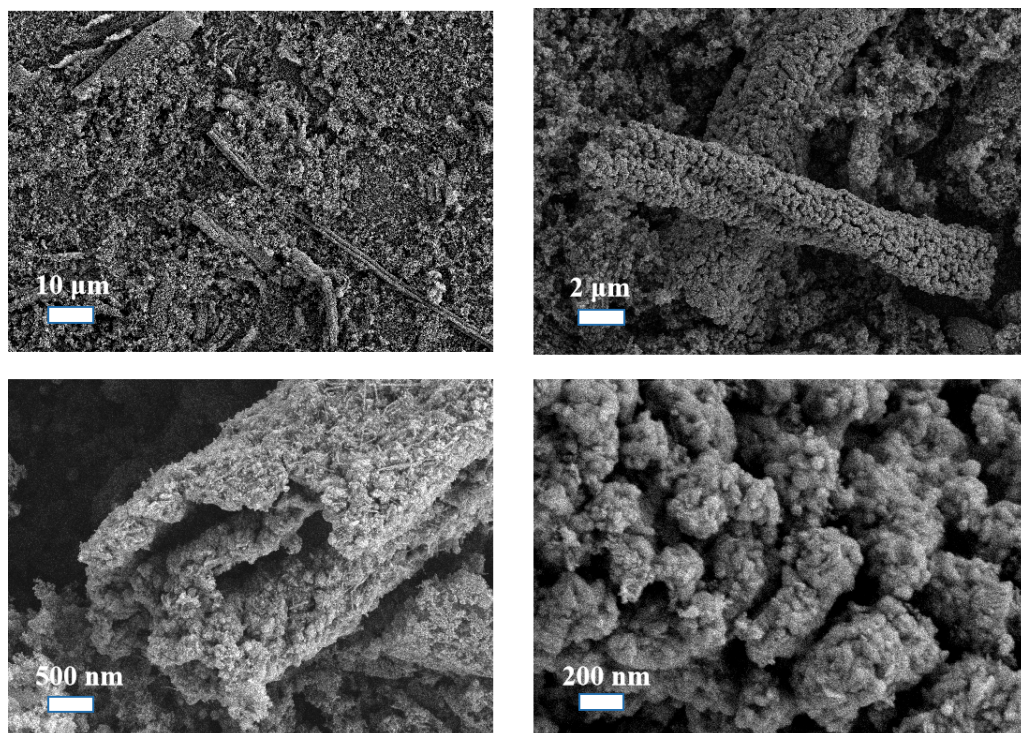

**Fig. S1** SEM images of Co/DCCF<sub>0.2</sub> derived from degreasing cotton

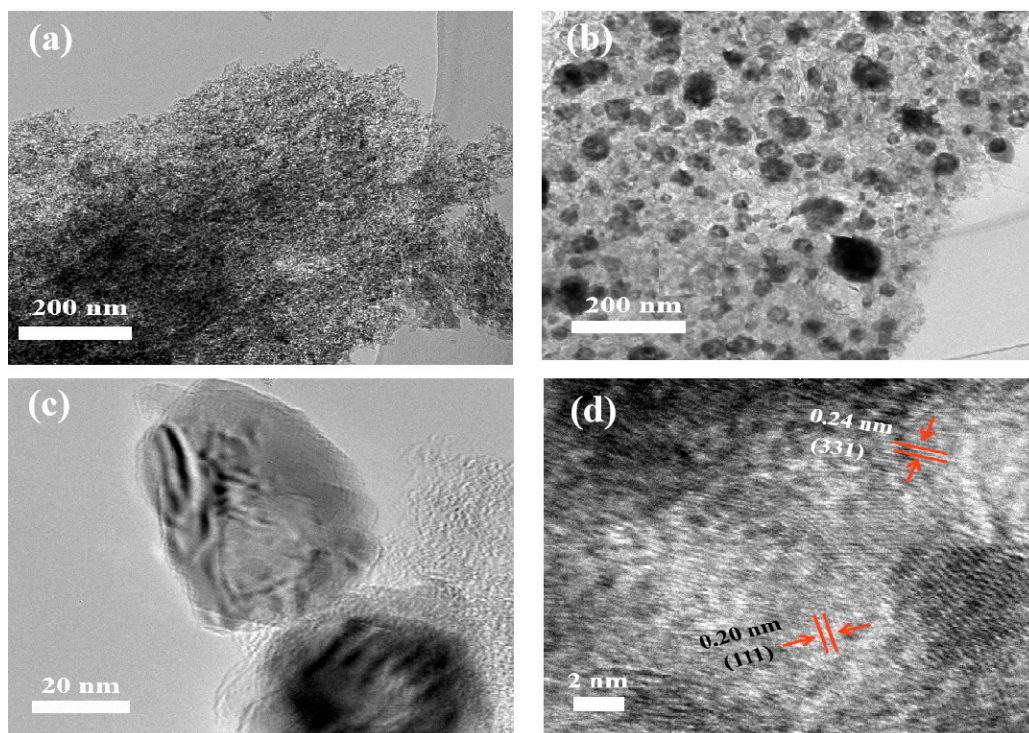

**Fig. S2** (a,b) TEM and (b,c) STEM images of Co/CCF<sub>0.2</sub>.

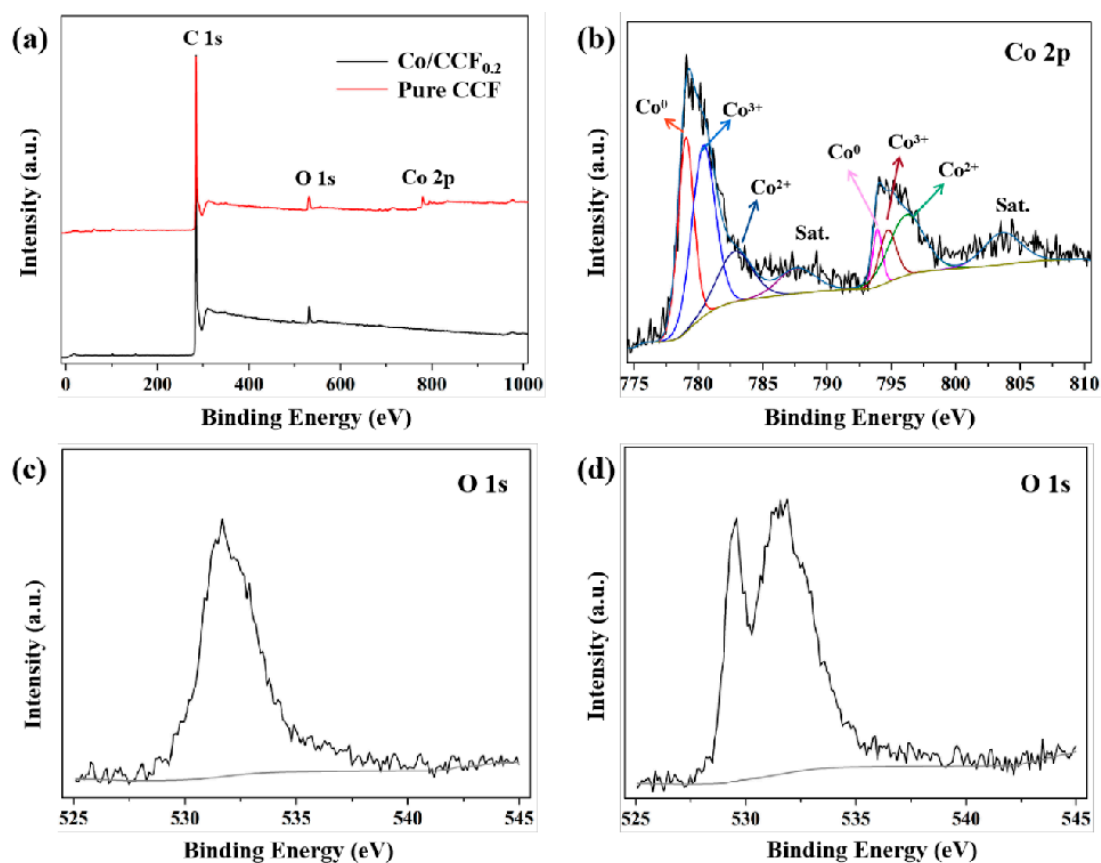

**Fig. S3** (a) XPS survey spectra of pure CCF and Co/CCF<sub>0.2</sub>; (b) High-resolution Co 2p spectrum and (d) O 1s spectrum of Co/CNF<sub>0.2</sub>; (c) O 1s spectrum of pure CCF.

Table S1. Porous textural properties of Co/CCF, Co/CCF<sub>0.1</sub>, Co/CCF<sub>0.2</sub>, Co/CCF<sub>0.4</sub>

and Co/DCCF<sub>0.2</sub> composites measured by nitrogen sorption

| Sample                 | S <sub>BET</sub><br>(m <sup>2</sup> /g) | Total pore volume<br>(cm <sup>3</sup> /g) | Average pore size<br>(nm) | Proportion of mesopores<br>(%) |
|------------------------|-----------------------------------------|-------------------------------------------|---------------------------|--------------------------------|
| Co/CCF                 | 880                                     | 0.807                                     | 5.24                      | 27.75                          |
| Co/CCF <sub>0.1</sub>  | 572                                     | 0.427                                     | 7.09                      | 32.55                          |
| Co/CCF <sub>0.2</sub>  | 342                                     | 0.461                                     | 8.35                      | 9.32                           |
| Co/CCF <sub>0.4</sub>  | 374                                     | 0.591                                     | 12.86                     | 7.44                           |
| Co/DCCF <sub>0.2</sub> | 214                                     | 0.321                                     | 16.9                      | 6.85                           |
